# Supplementary material for: Arabidopsis thaliana cbp80, c2h2, and flk Knockout Mutants Accumulate Increased Amounts of Circular RNAs
Source: MDPI journal article supplement (doi:10.3390/cells9091937), 2020-08-21
Supplement: s1 [file s1]

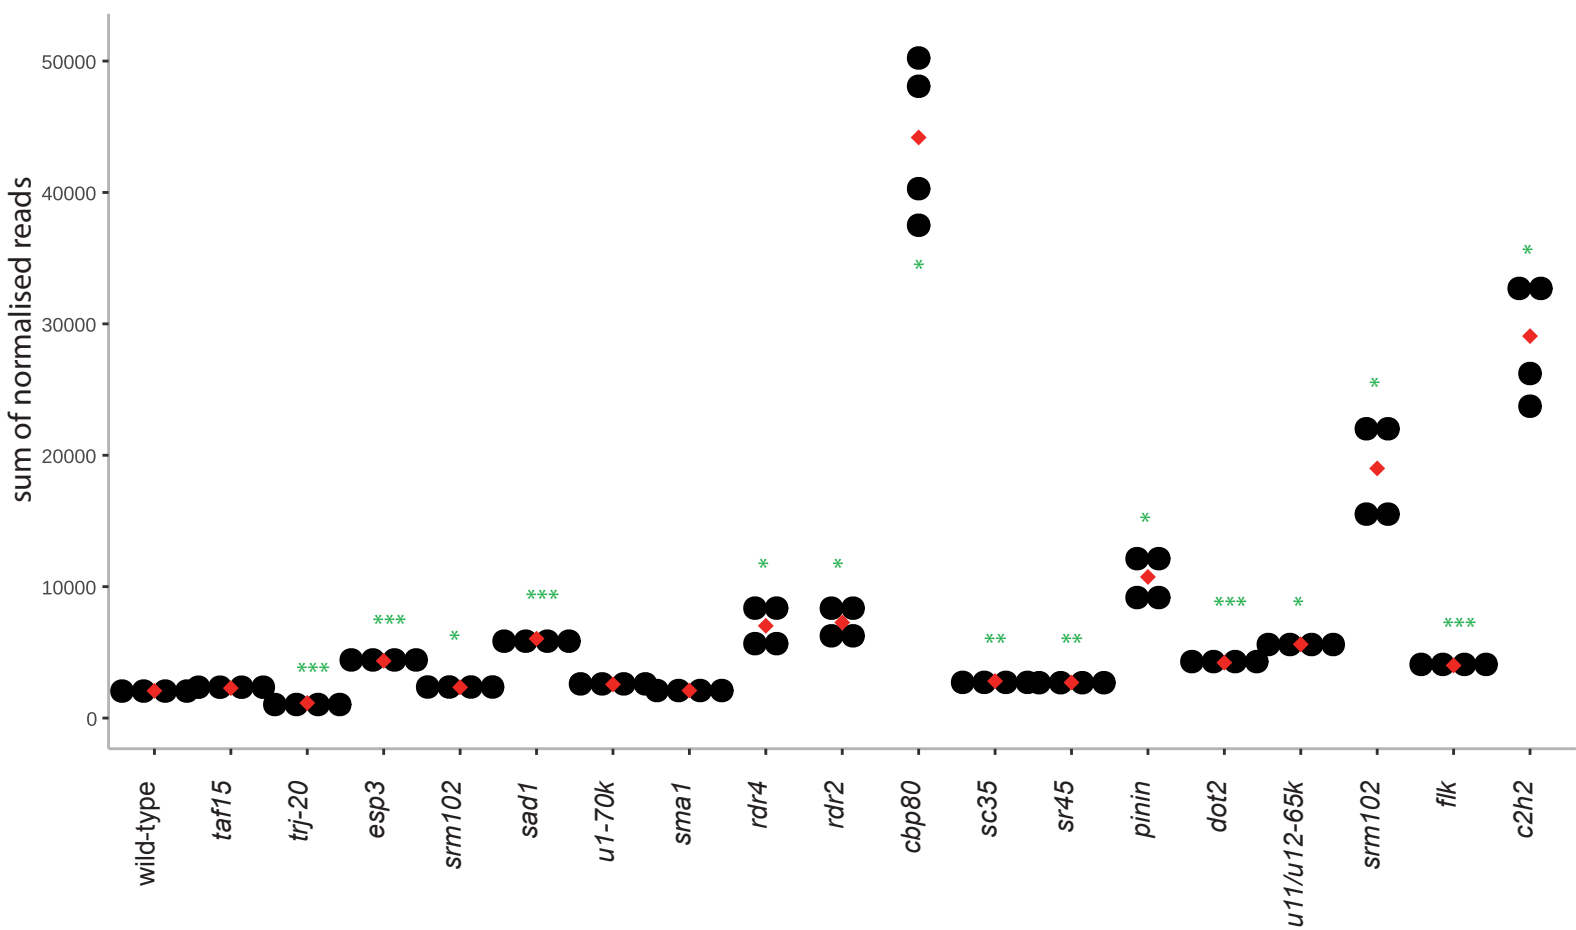

Supplementary Figure 8.

Accumulation level of circRNAs' linear counterparts in the wild-type and mutant plants

(p-value  $\leq 0.05$  \*,  $\leq 0.01$  \*\*,  $\leq 0.001$  \*\*\*).
