# Supplementary material for: Arabidopsis thaliana cbp80, c2h2, and flk Knockout Mutants Accumulate Increased Amounts of Circular RNAs
Source: MDPI journal article supplement (doi:10.3390/cells9091937), 2020-08-21
Supplement: s1 [file s1]

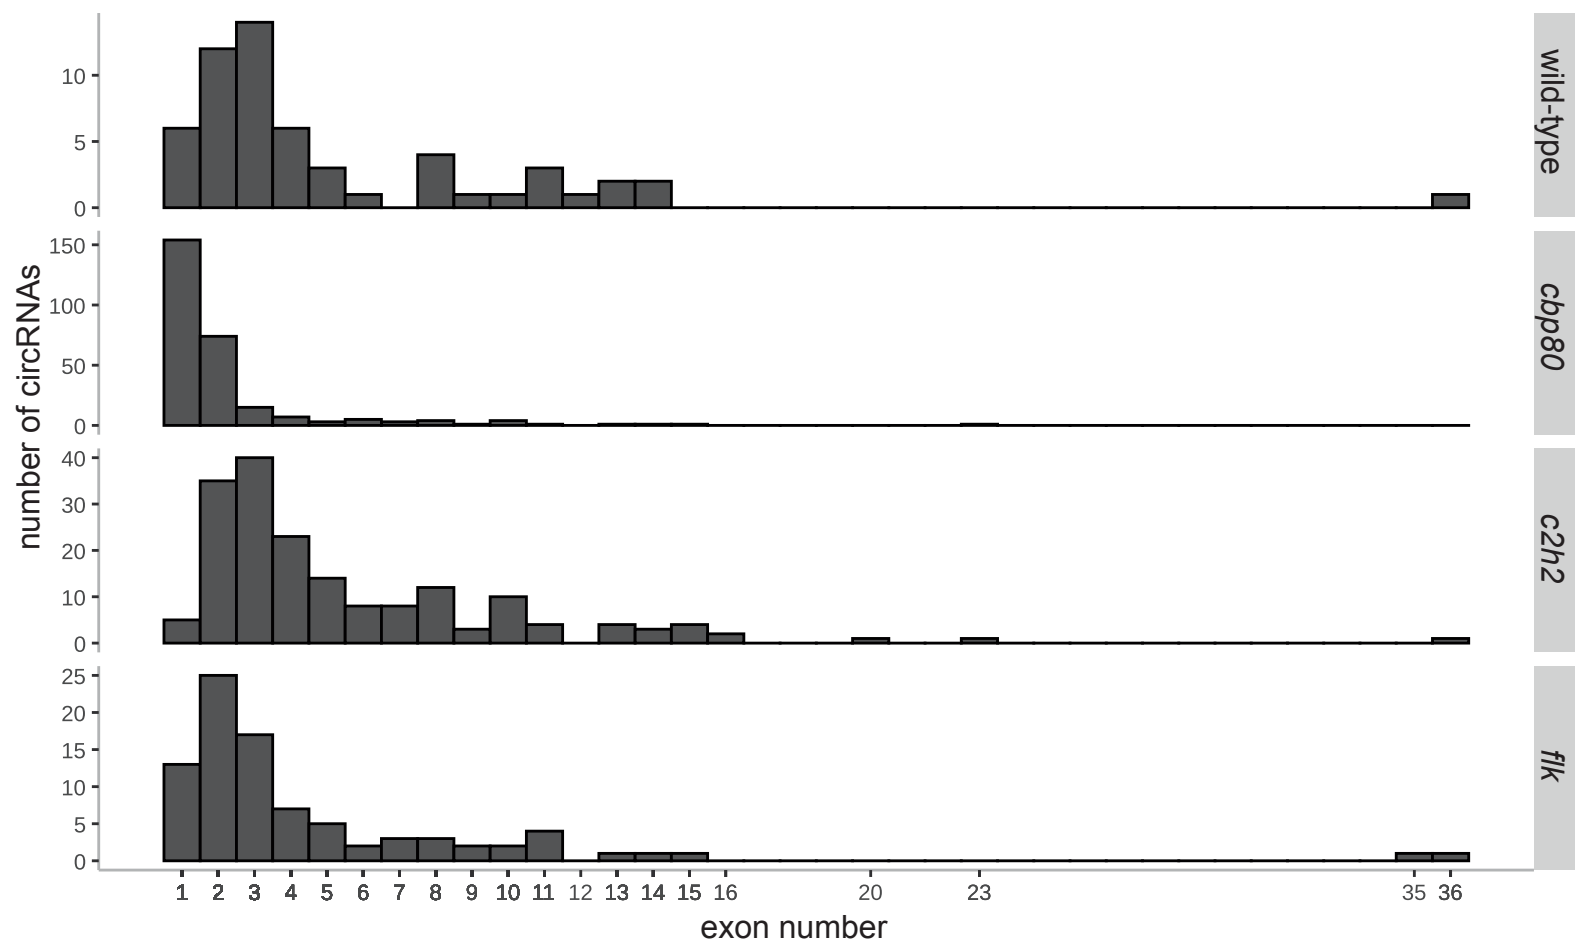

Supplementary Figure 5.

Number of circRNAs, identified in minimum 3 biological replicates, starting with the specified exon number in the wild-type plant, *cbp80*, *c2h2*, and *flk* mutants.
