# Supplementary material for: Arabidopsis thaliana cbp80, c2h2, and flk Knockout Mutants Accumulate Increased Amounts of Circular RNAs
Source: MDPI journal article supplement (doi:10.3390/cells9091937), 2020-08-21
Supplement: s1 [file s1]

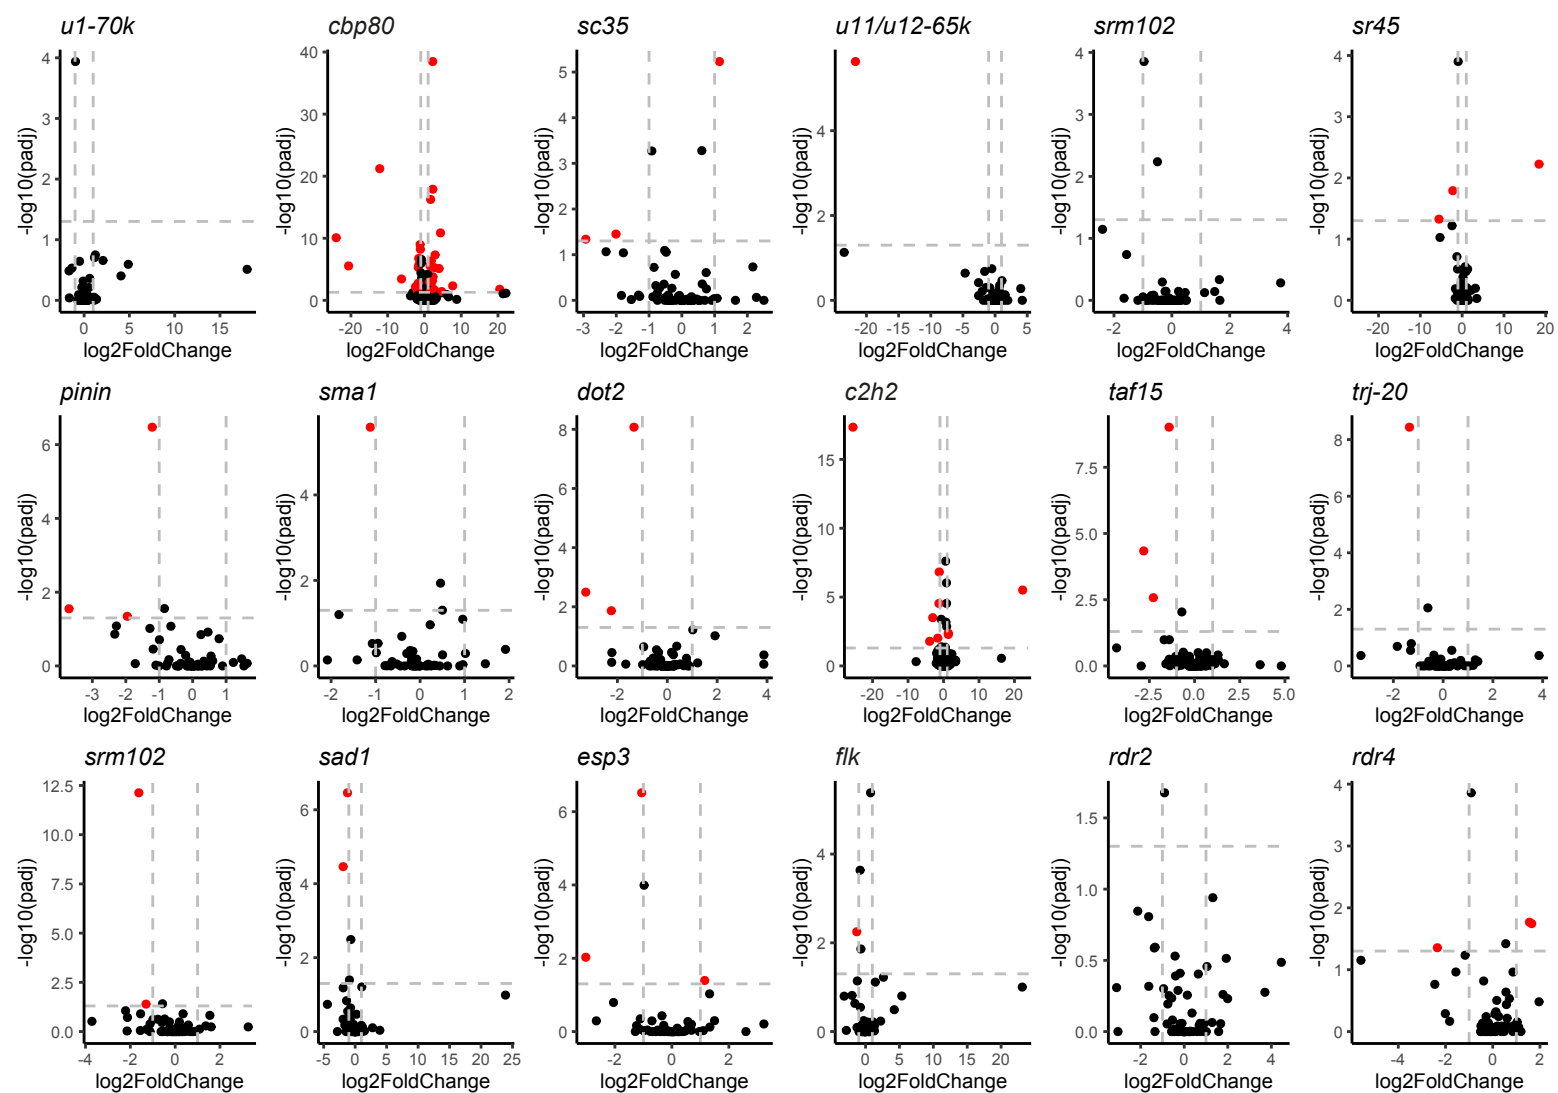

Supplementary Figure 11.

The expression profile of transcripts from genes generating circRNAs (identified in 4 biological replicates) in mutants vs. wild-type plants.
