# Supplementary material for: Arabidopsis thaliana cbp80, c2h2, and flk Knockout Mutants Accumulate Increased Amounts of Circular RNAs
Source: MDPI journal article supplement (doi:10.3390/cells9091937), 2020-08-21
Supplement: s1 [file s1]

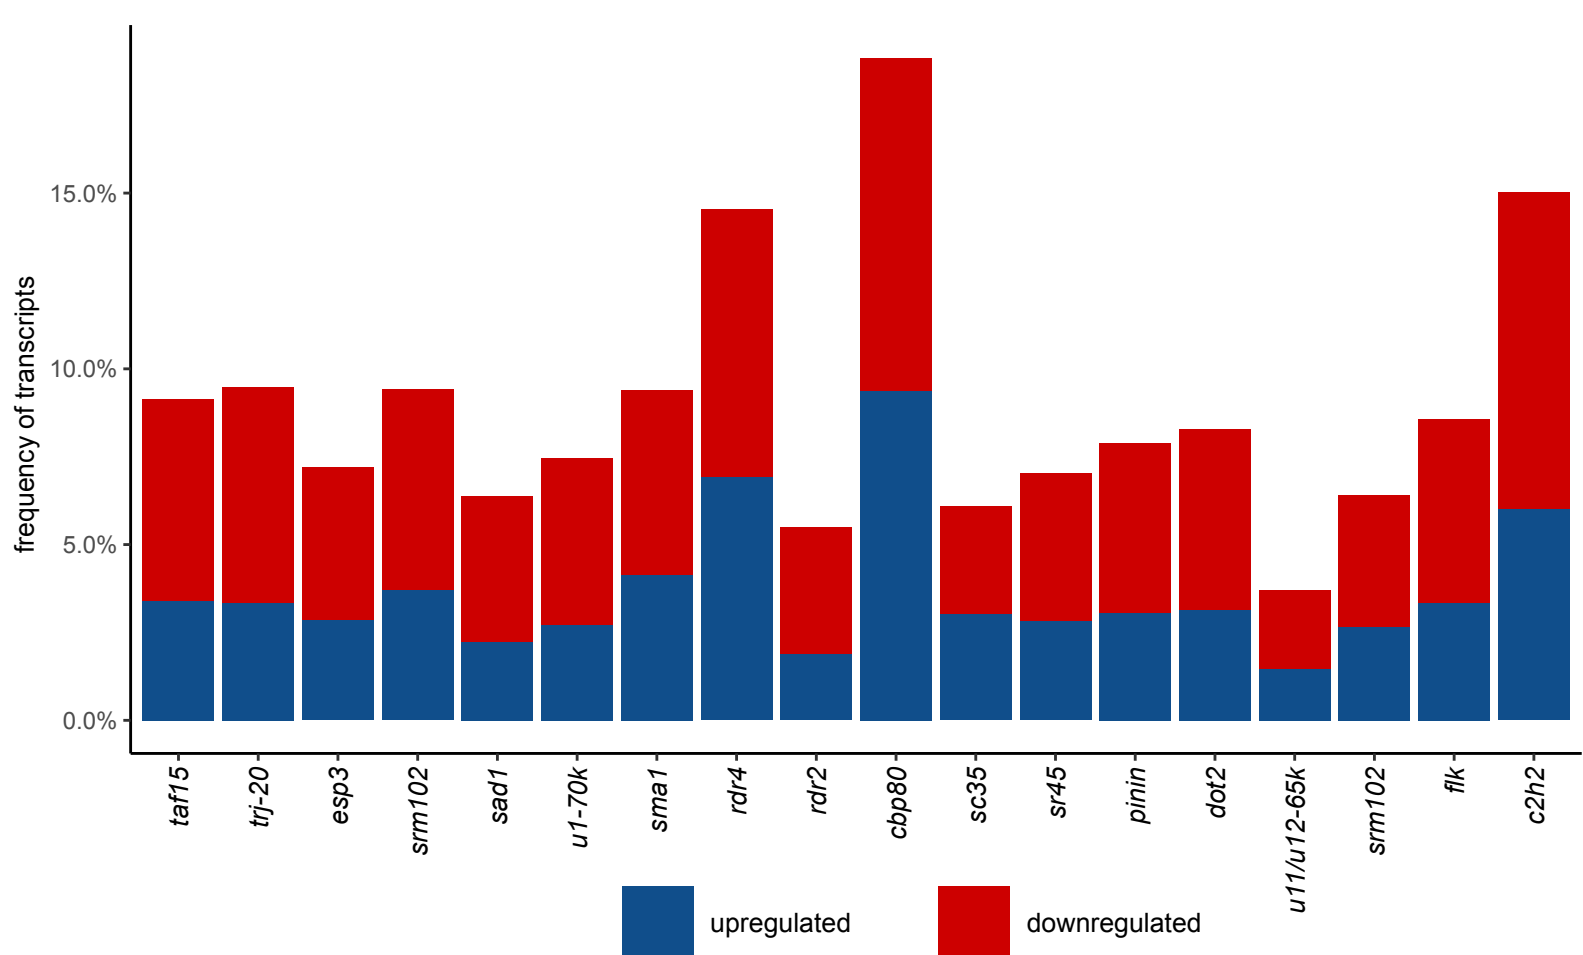

Supplementary Figure 9.

The percentage of differentially expressed transcripts in mutants compared to the wild-type plant.
